# Supplementary material
Source: PubMed Central journal article supplement (PMC2682011)
Supplement: supp_29_11_3134__1.pdf [file supp_29_11_3134__1.pdf]

Fig. S1

Kishi, K et al.

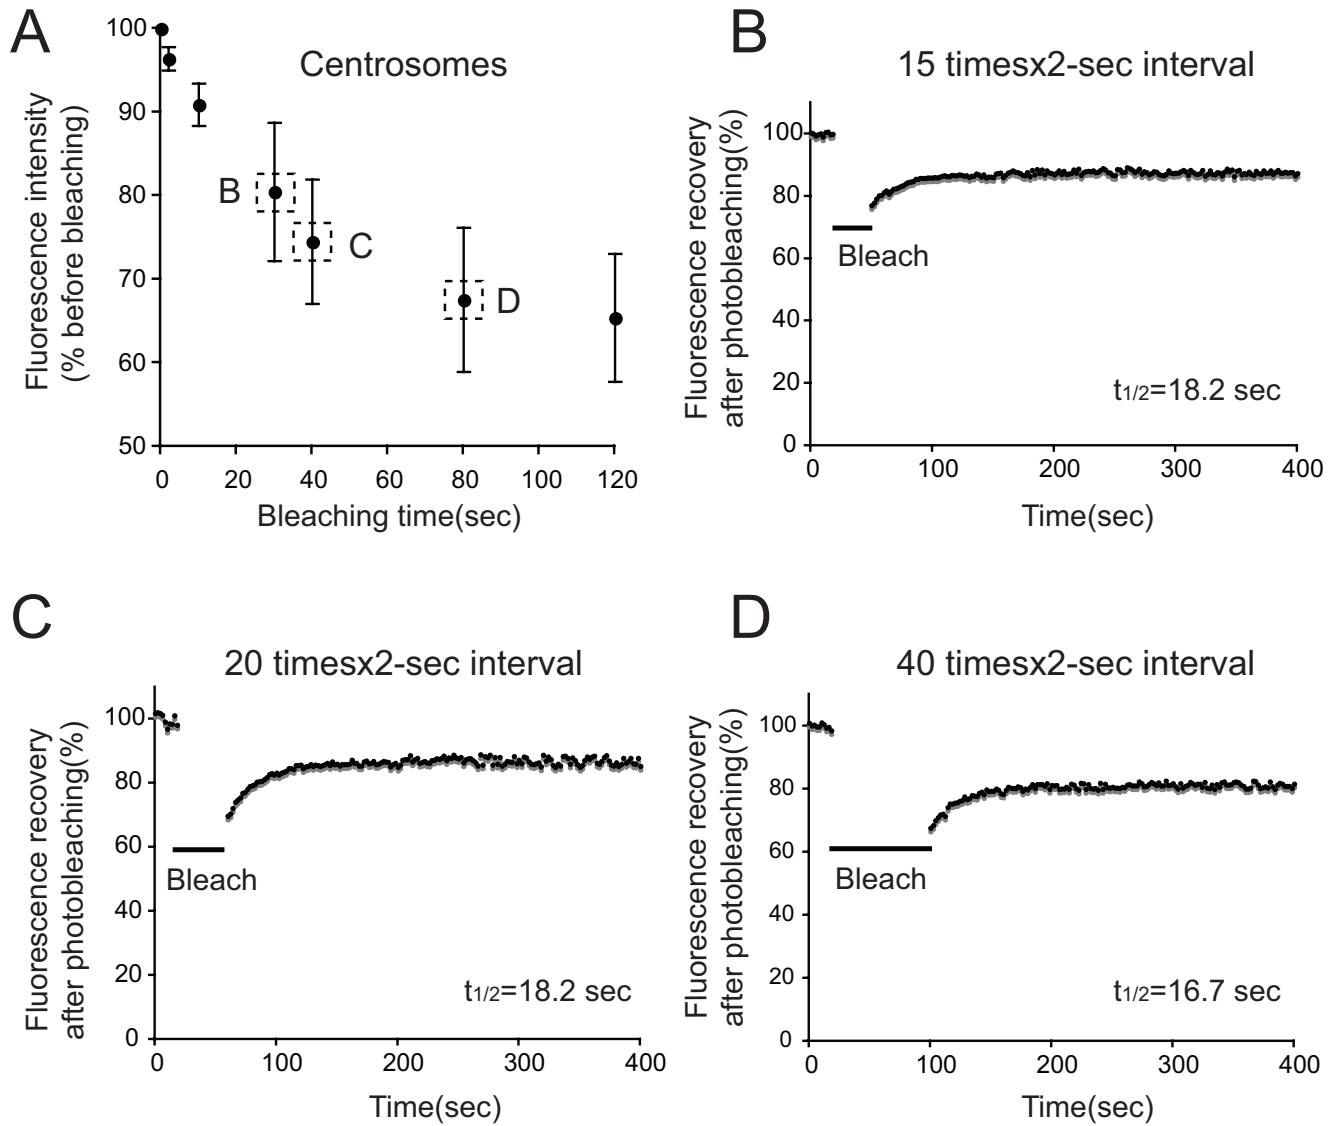

Fig. S2

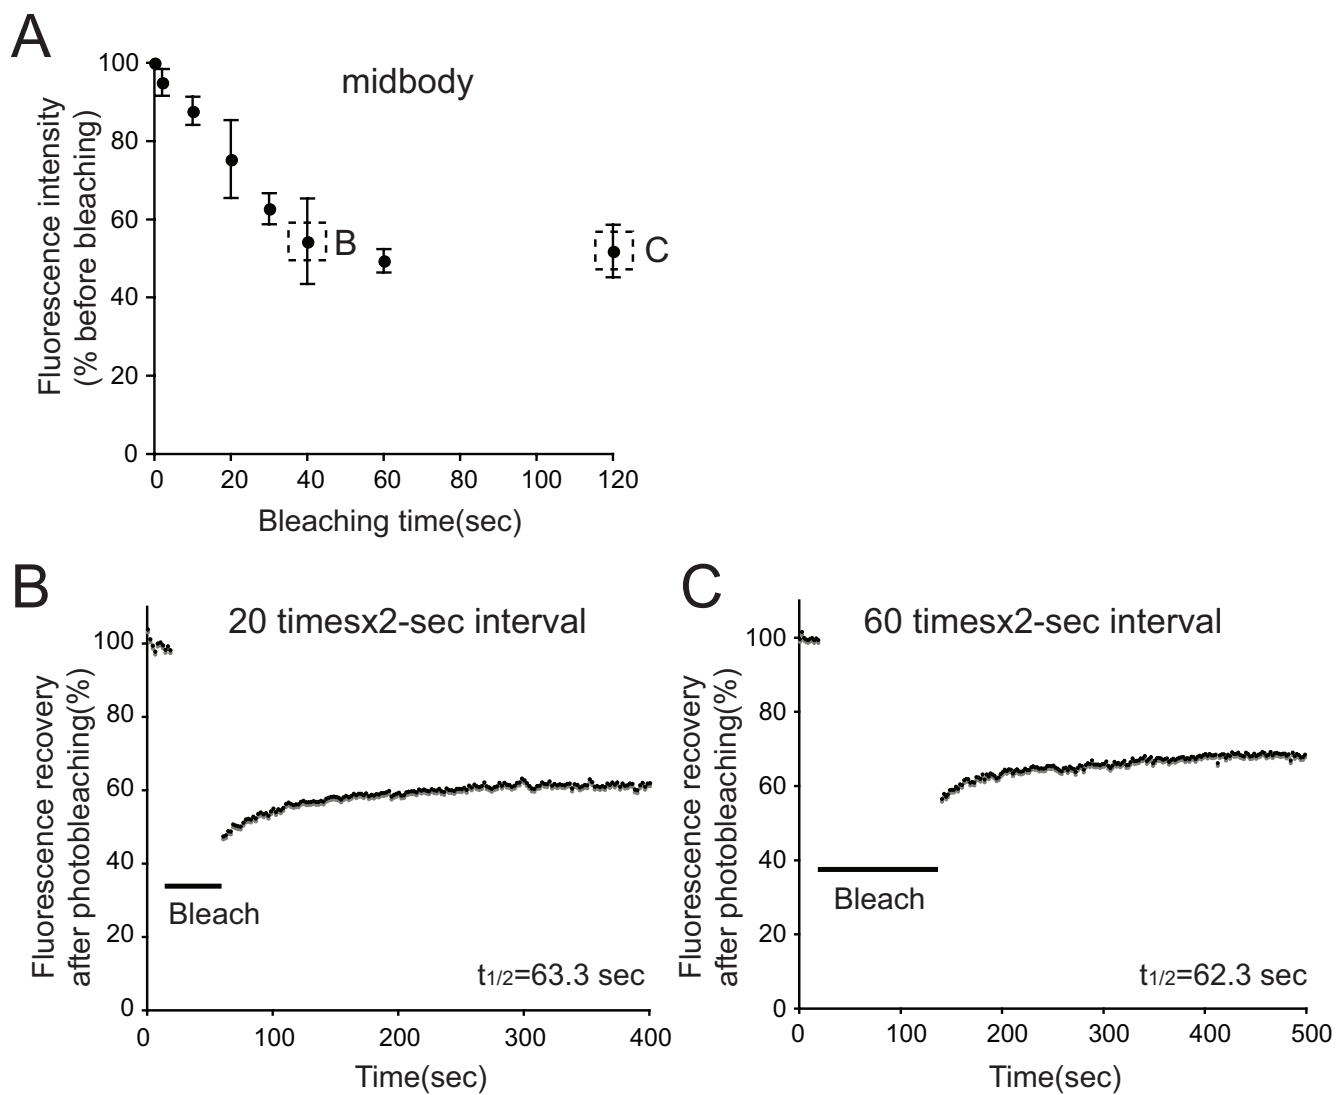

Fig. S3

Kishi, K. et al.

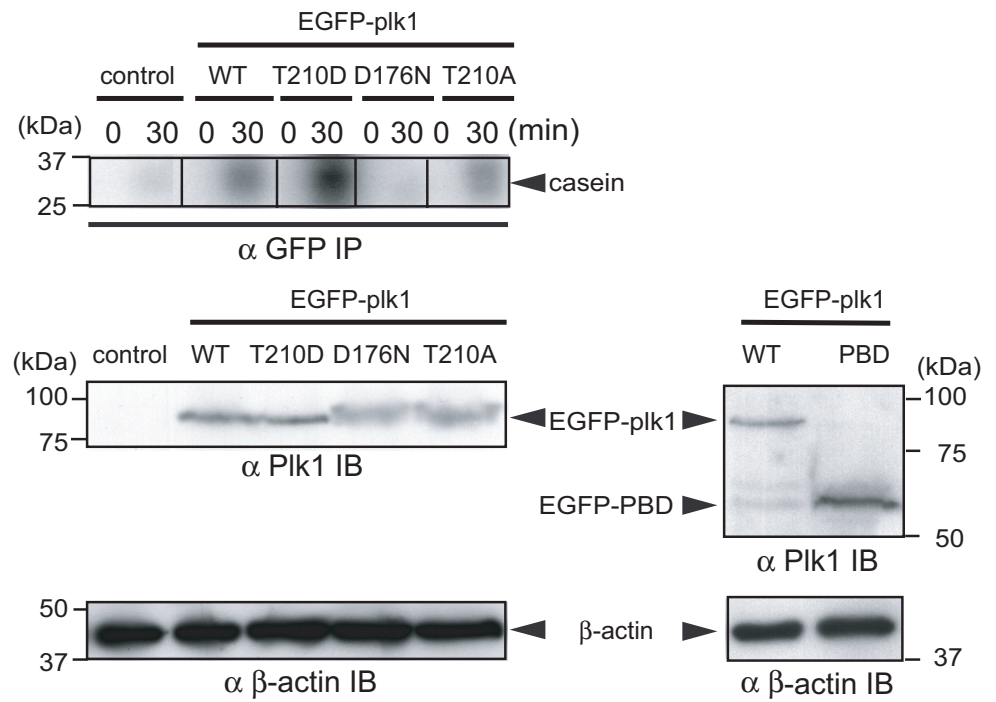

Fig. S4

Kishi, K. et al.

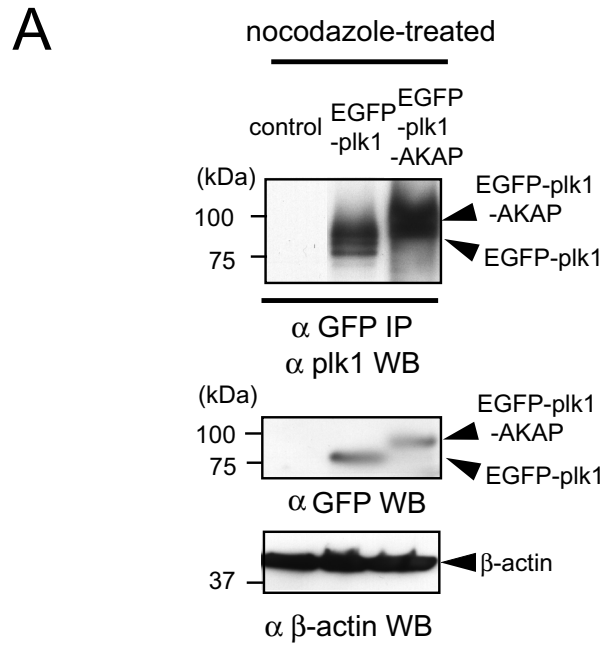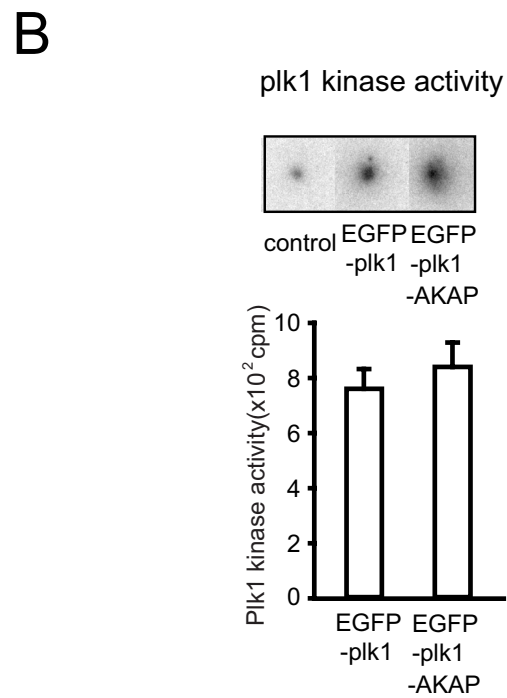

Fig. S5

Kishi, K. et al.

A

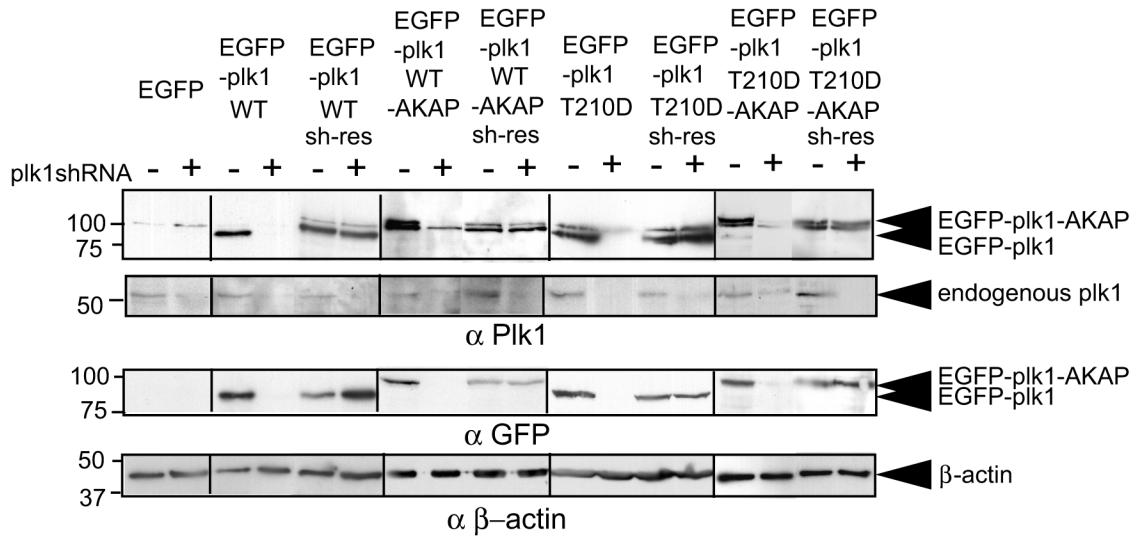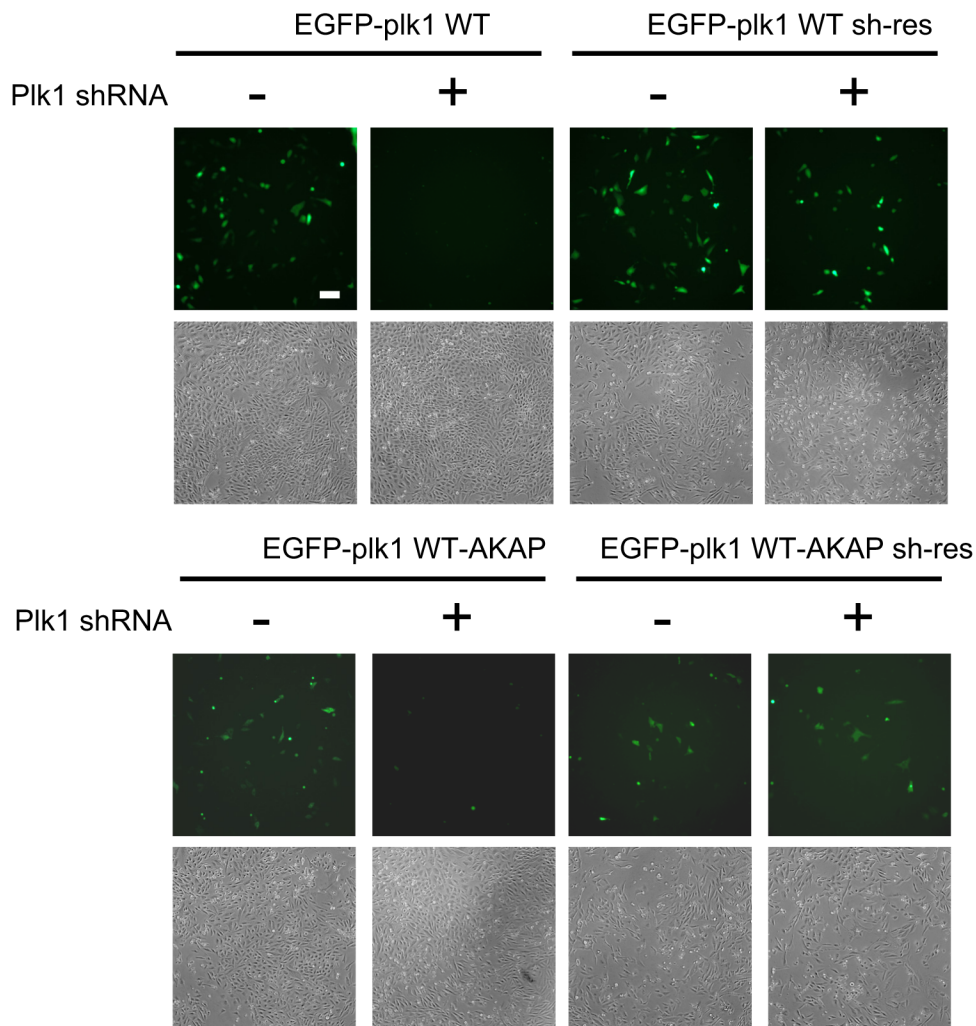

Fig. S5

Kishi, K. et al.

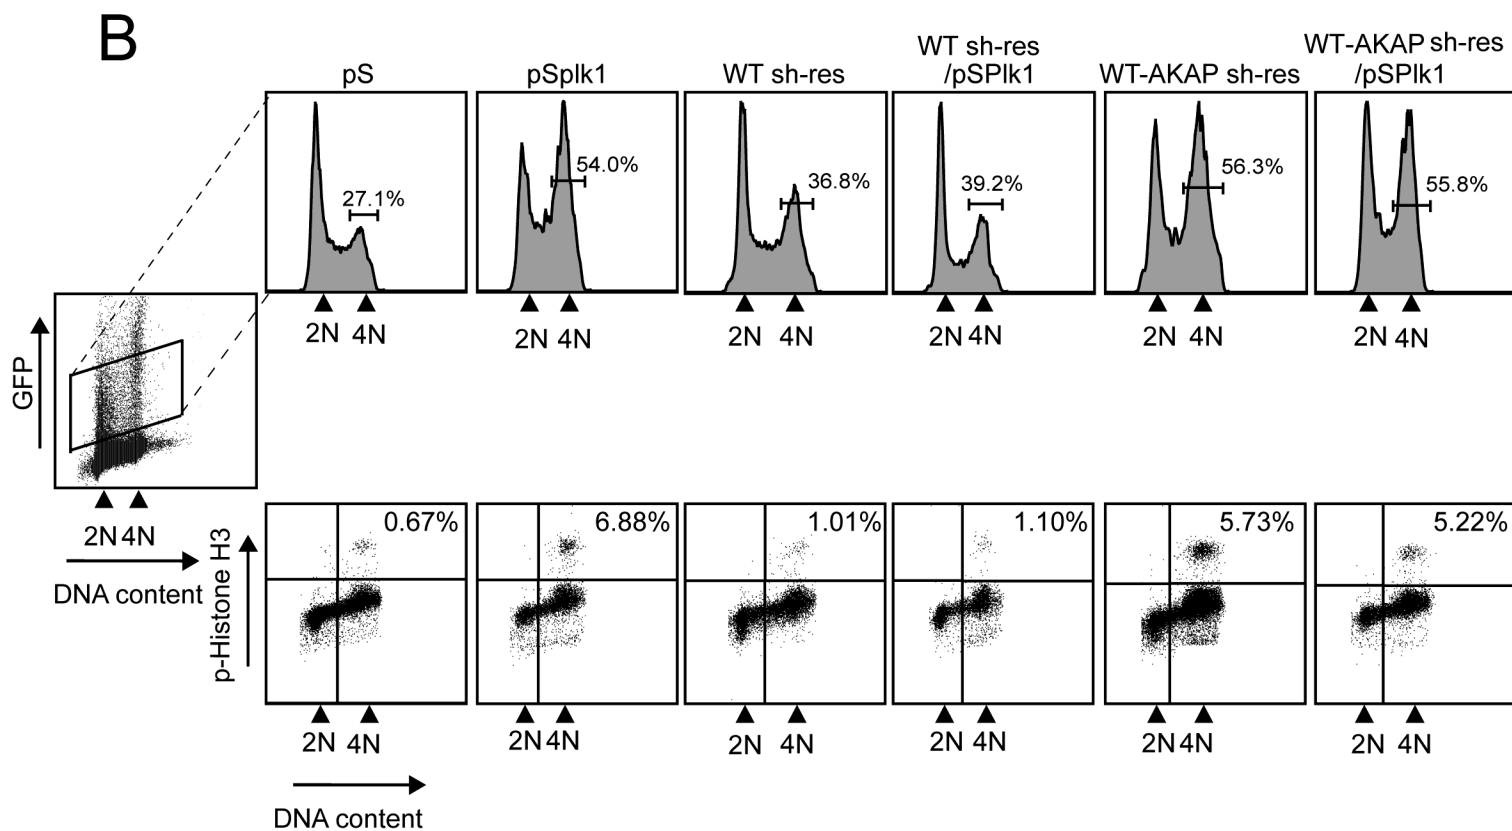

**C**

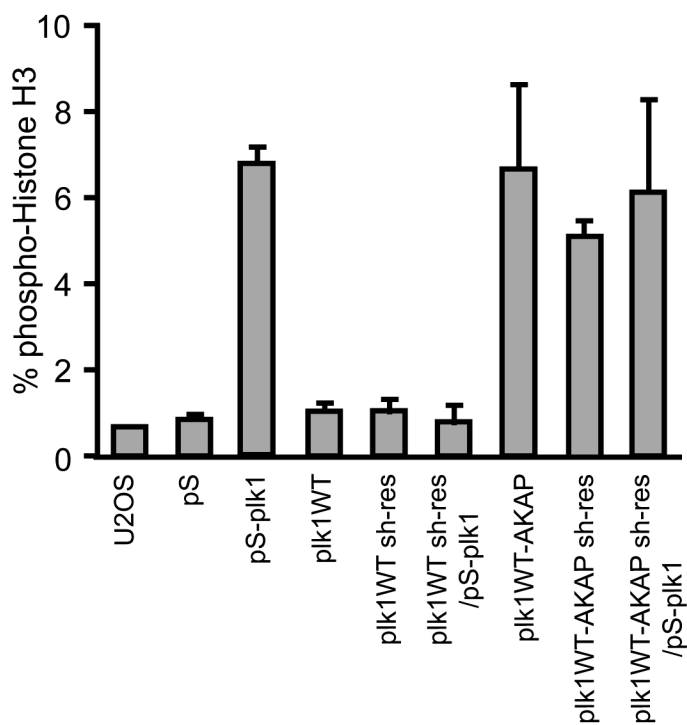

Fig. S6

Kishi, K. et al.

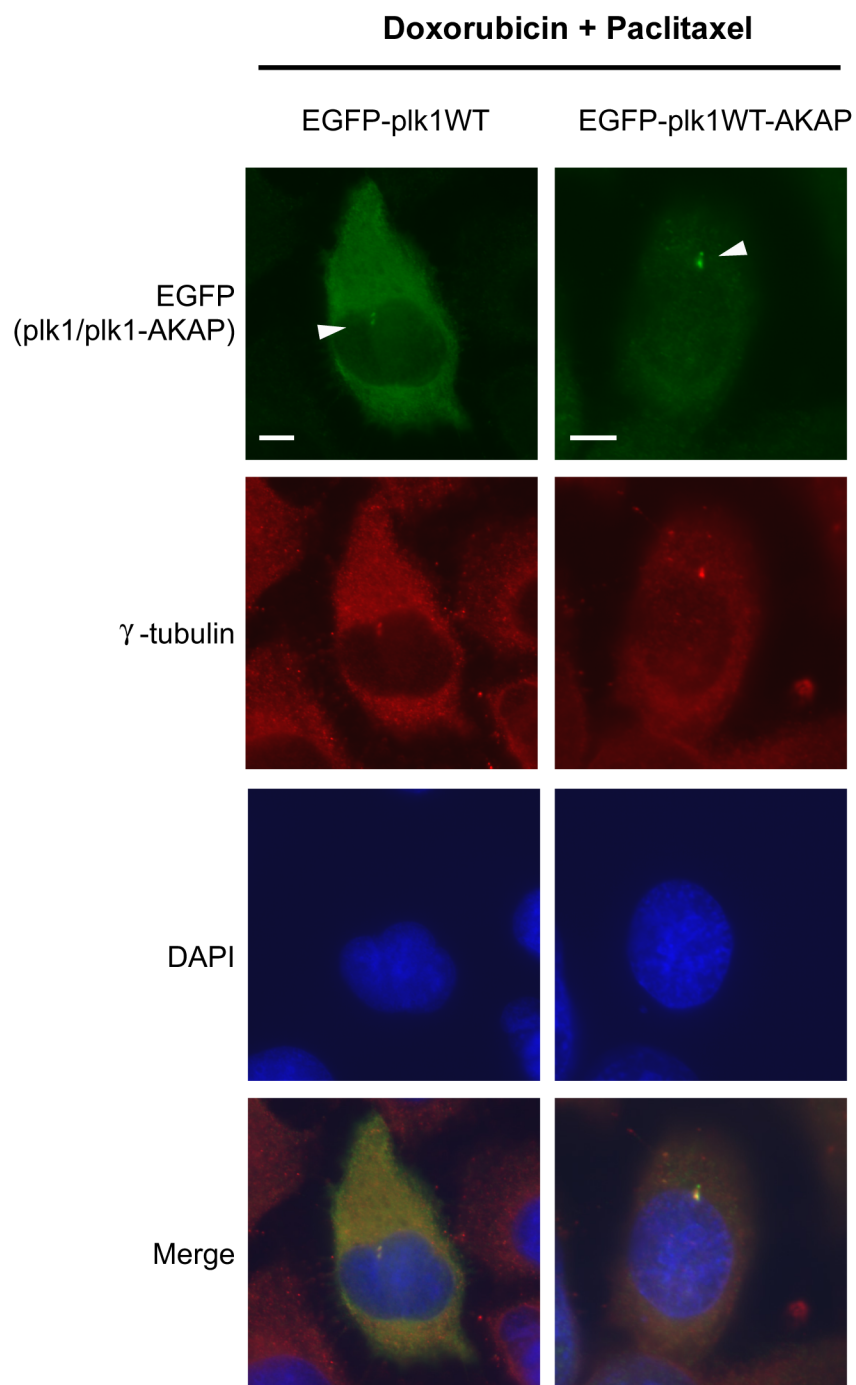

Fig. S7

*Kishi, K. et al.*

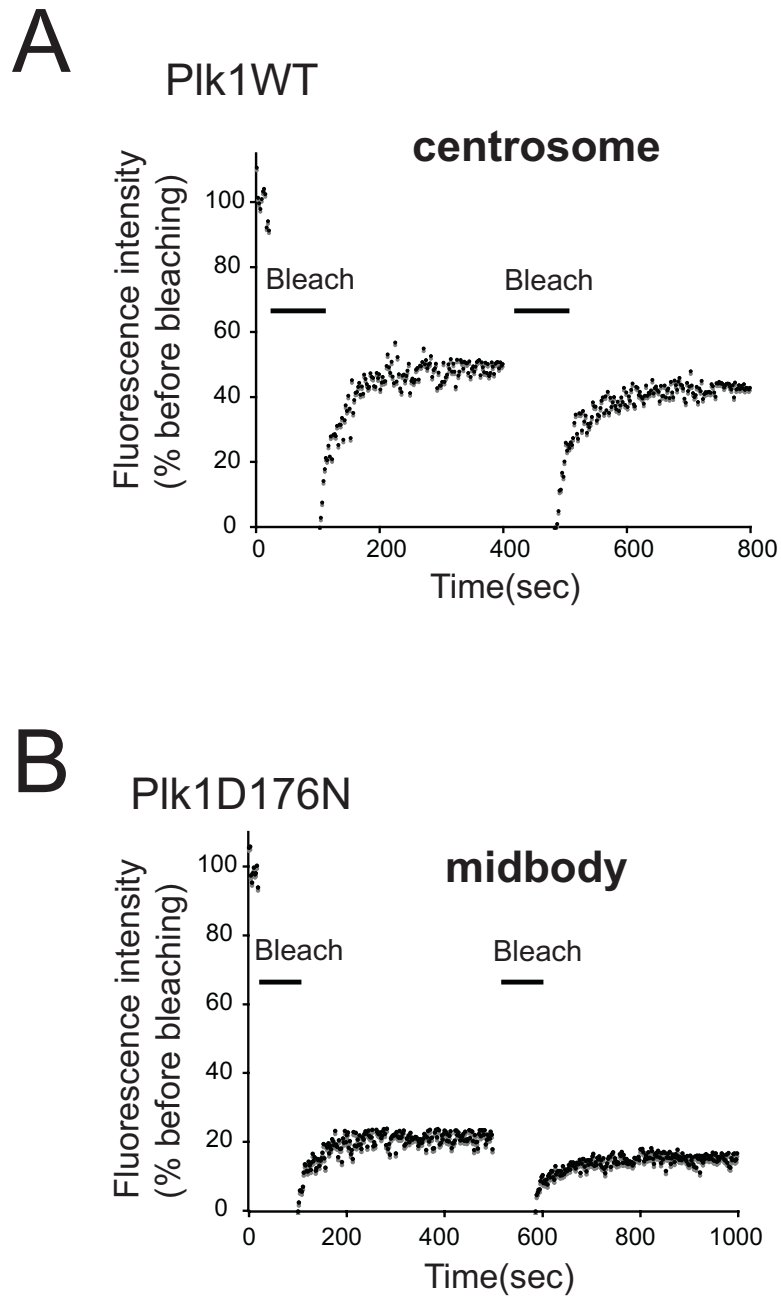



Fig. S8

Kishi, K. et al.

A

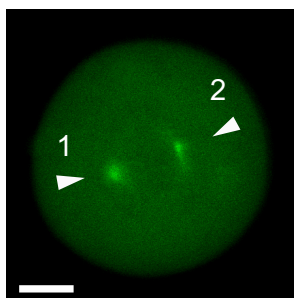

B

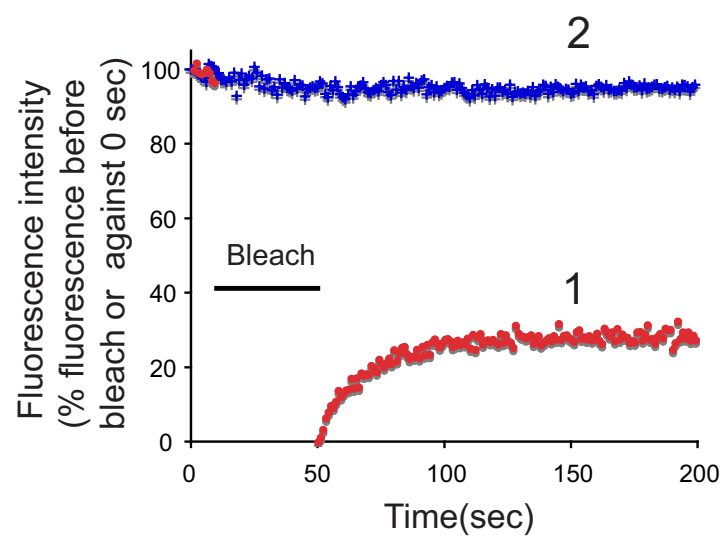

Fig. S9

centrosomes

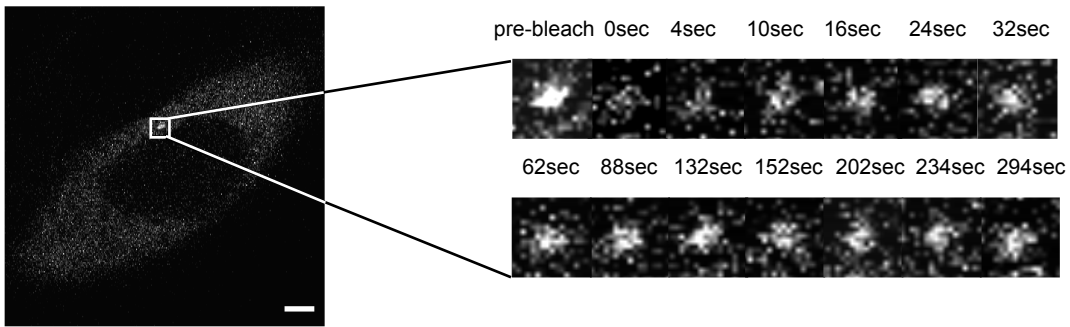

mitotic centrosomes

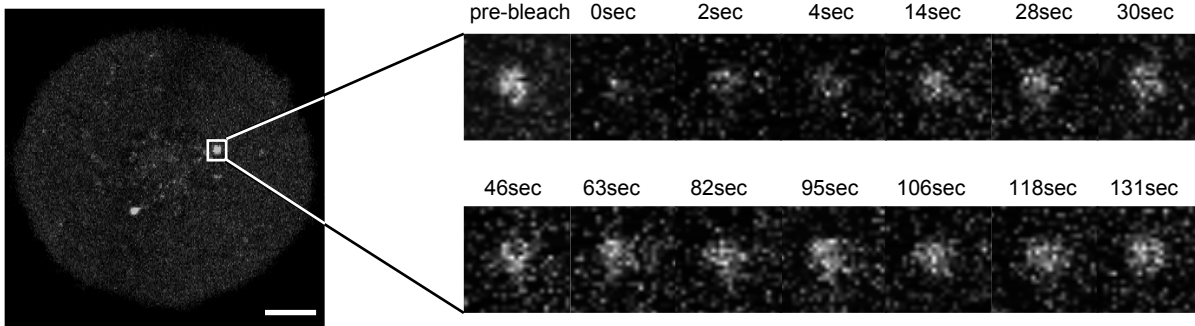

kinetochores

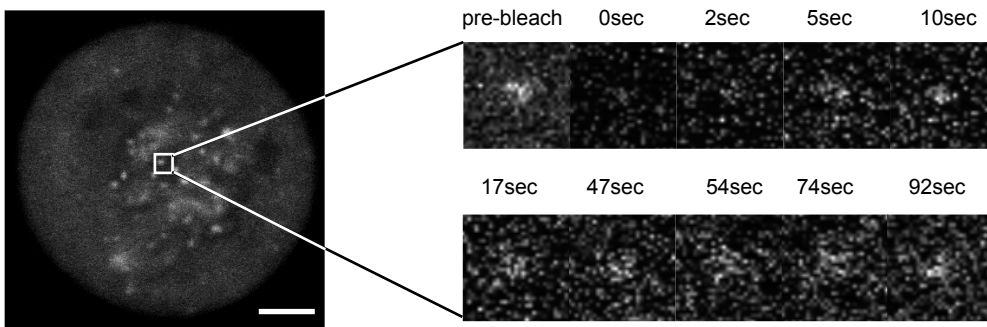

midbodies

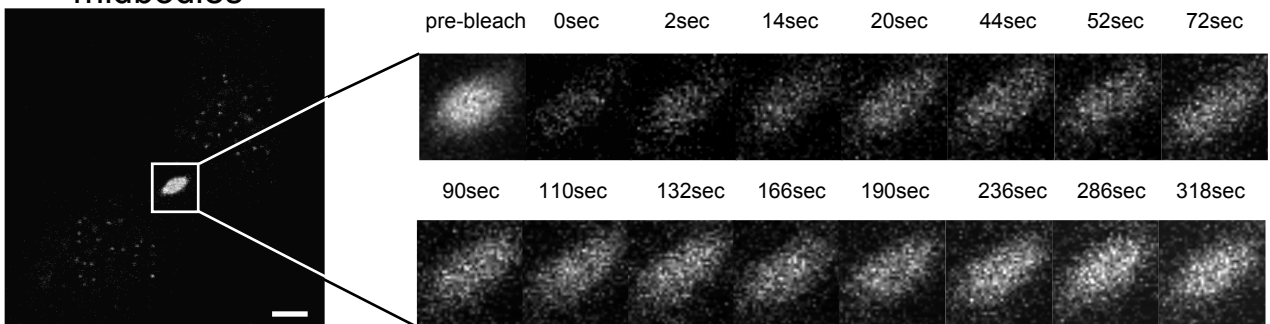

Table S1. Fluorescence intensities of EGFP-Pik1 wild type or mutants used for FRAP

| Fluorescence intensity     |         | Mean | Minimum | Maximum |
|----------------------------|---------|------|---------|---------|
| <b>G2 centrosomes</b>      | WT      | 9.3  | 6.3     | 13.3    |
|                            | T210D   | 9.0  | 5.5     | 13.6    |
|                            | D176N   | 9.2  | 6.0     | 12.0    |
|                            | T210A   | 8.2  | 5.6     | 12.2    |
|                            | PBD     | 7.8  | 4.5     | 10.1    |
|                            | WT-AKAP | 7.0  | 4.9     | 12.0    |
| <b>mitotic centrosomes</b> | WT      | 7.7  | 4.1     | 13.2    |
|                            | T210D   | 7.7  | 6.4     | 8.6     |
|                            | D176N   | 8.3  | 5.9     | 9.4     |
|                            | T210A   | 7.8  | 6.3     | 12.1    |
|                            | PBD     | 7.9  | 5.6     | 13.6    |
| <b>kinetochores</b>        | WT      | 6.1  | 3.5     | 7.6     |
|                            | D176N   | 6.4  | 5.4     | 8.4     |
|                            | PBD     | 6.3  | 4.9     | 8.3     |
| <b>midbodies</b>           | WT      | 10.5 | 5.4     | 15.9    |
|                            | T210D   | 11.3 | 8.2     | 15.7    |
|                            | D176N   | 10.4 | 3.6     | 14.1    |
|                            | T210A   | 11.2 | 7.9     | 12.4    |
|                            | PBD     | 11.3 | 5.8     | 18.6    |

(arbitrary unit( $\times 10^6$ ))

Fluorescence intensity was measured by pixel integration at each of the subcellular structures listed above. For each structure, the intensities of each construct were measured with the photomultiplier gain set to the same constant value.
